# Supplementary material for: Deregulated protein homeostasis constrains fetal hematopoietic stem cell pool expansion in Fanconi anemia
Source: Springer Nature journal article supplement (doi:10.1038/s41467-024-46159-1), 2024-02-29
Supplement: MOESM1 [file 41467_2024_46159_MOESM1_ESM.pdf › 41467_2024_46159_MOESM1_ESM.pdf]

# Supplementary Figure 1

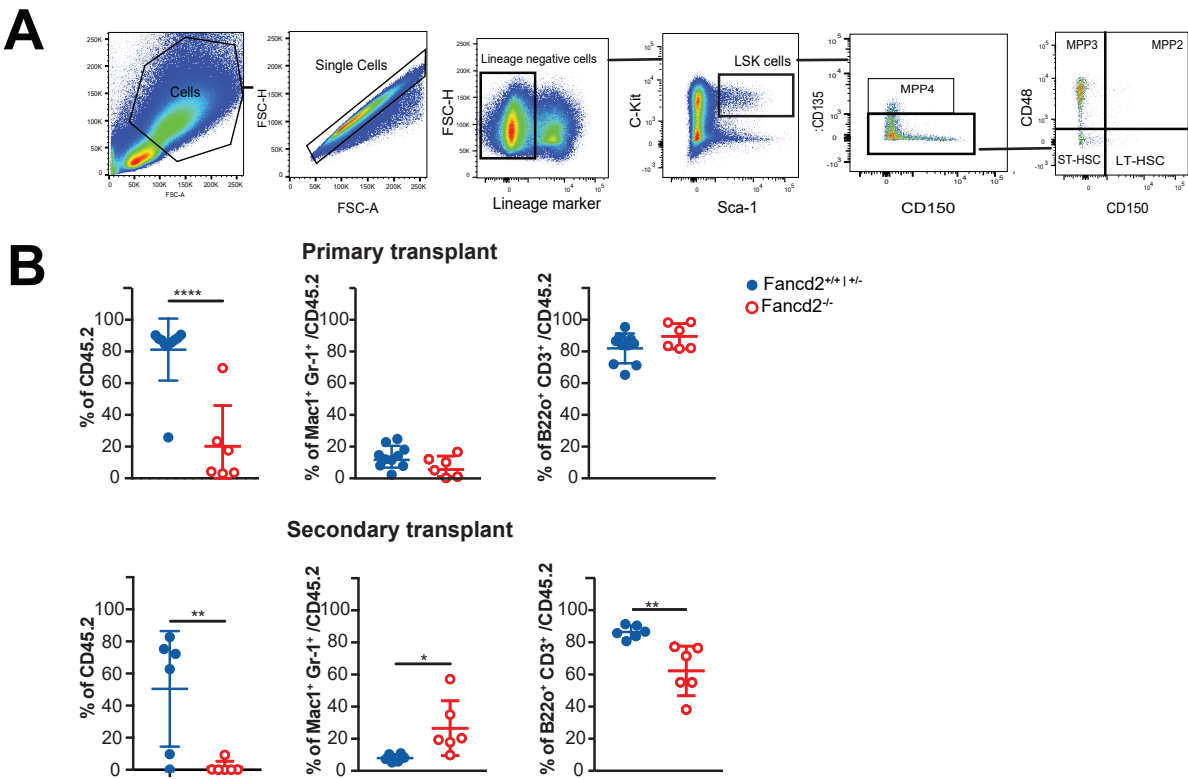

# Supplementary Figure 2

**A**

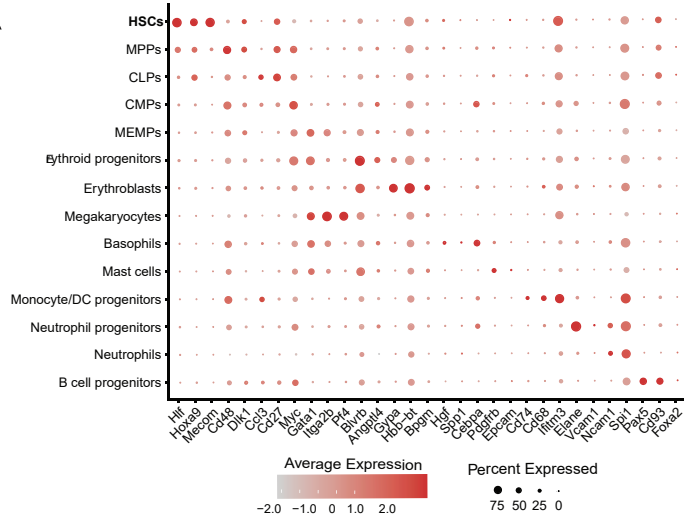

**B**

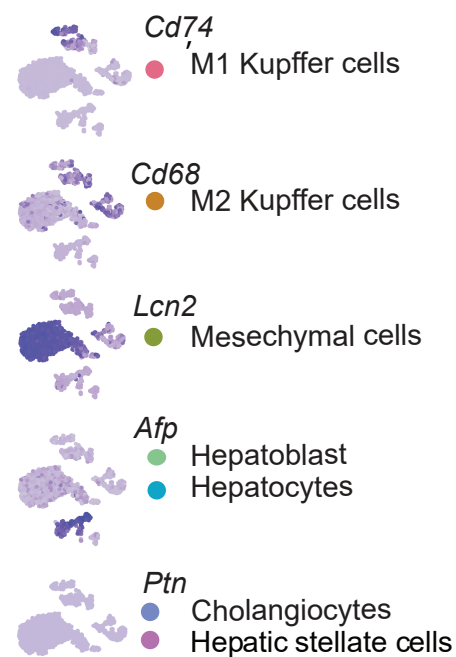

**C**

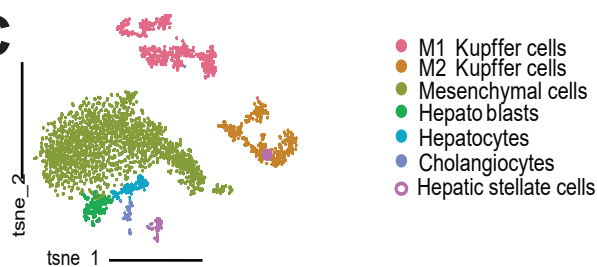

**D**

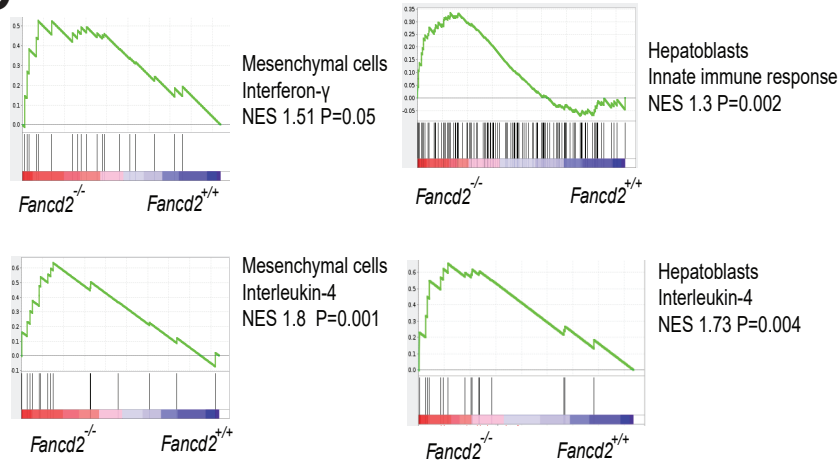

**E**

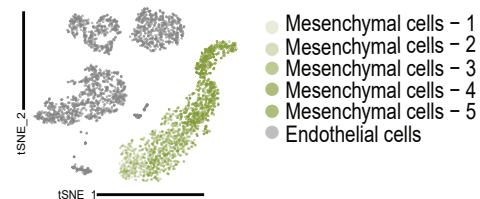

**F**

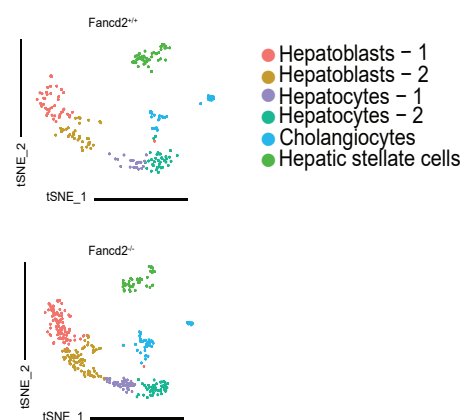

# Supplementary Figure 3

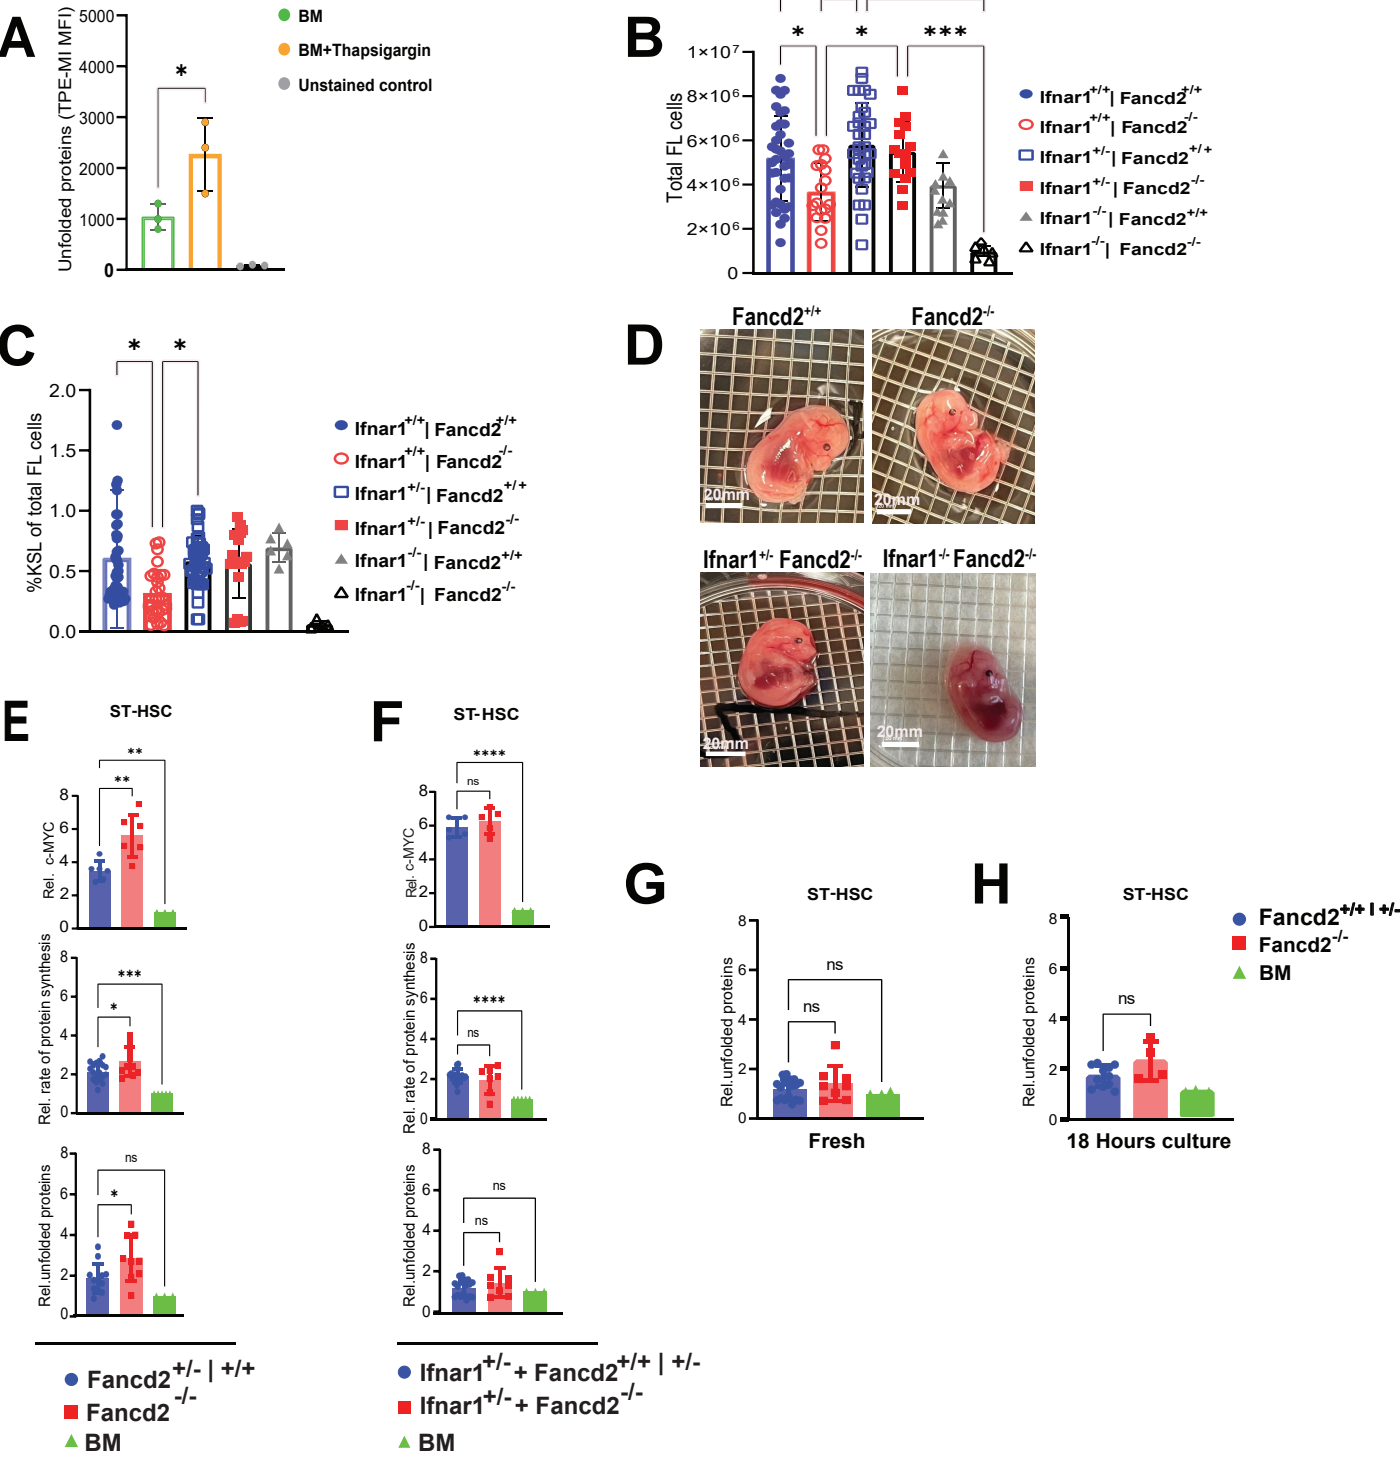

# Supplementary Figure 4

**A**

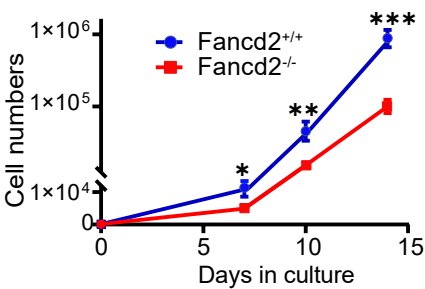

**B**

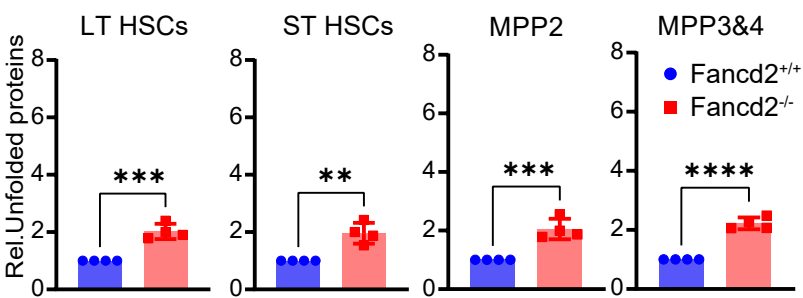

**C**

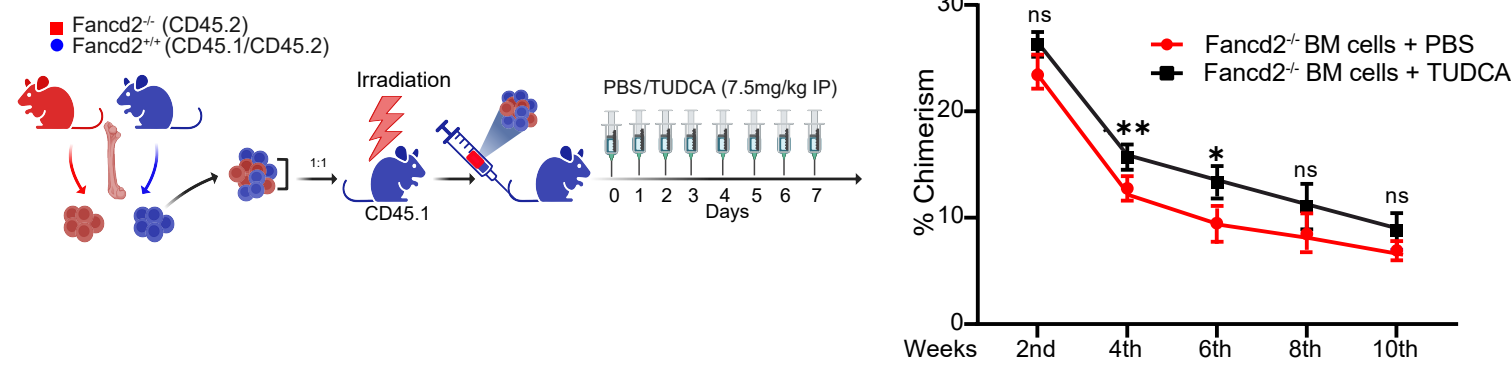

**D**

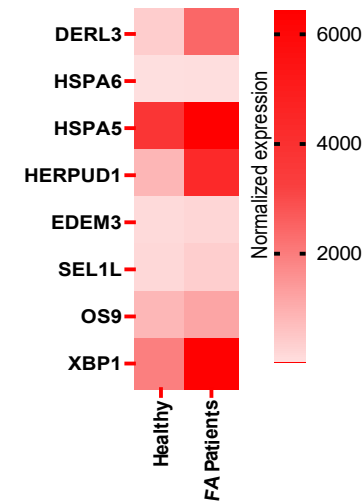

**E**

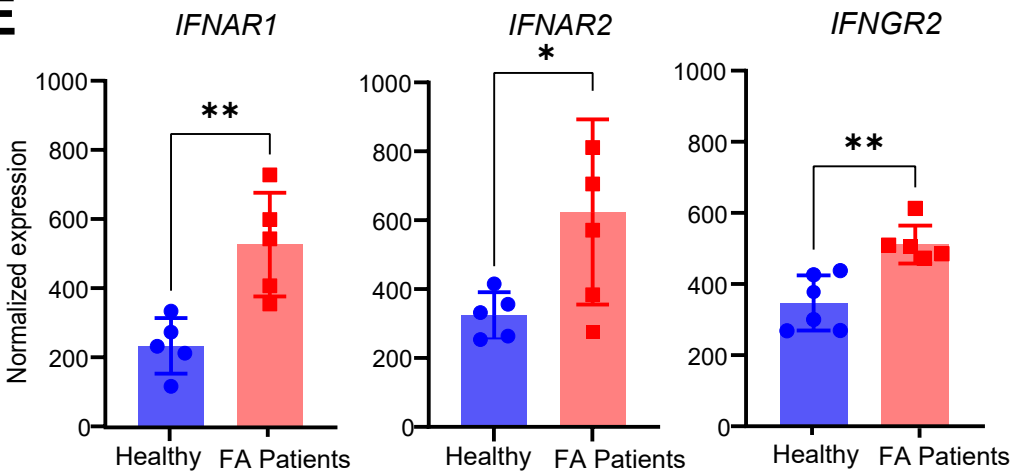



Supplementary Figure 5

A

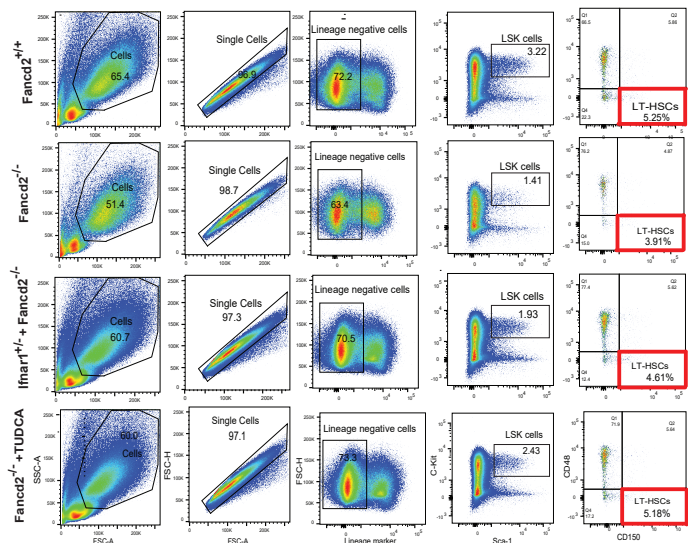

B

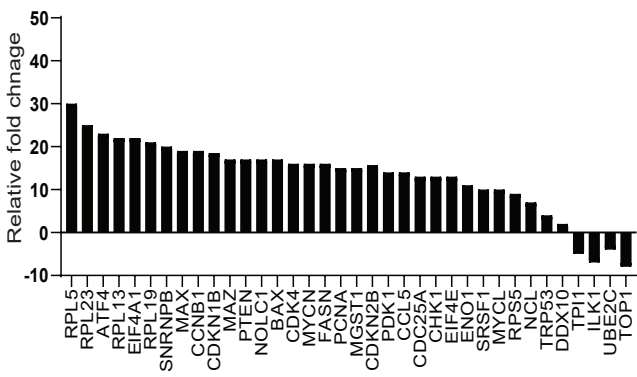

C

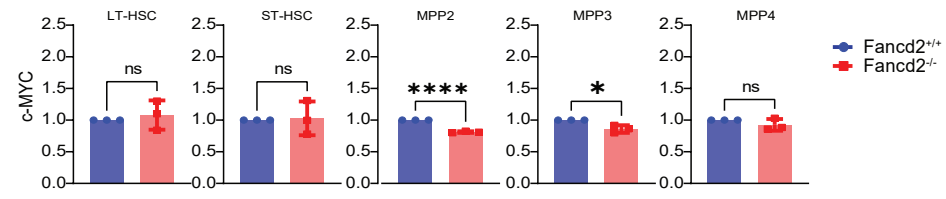

D

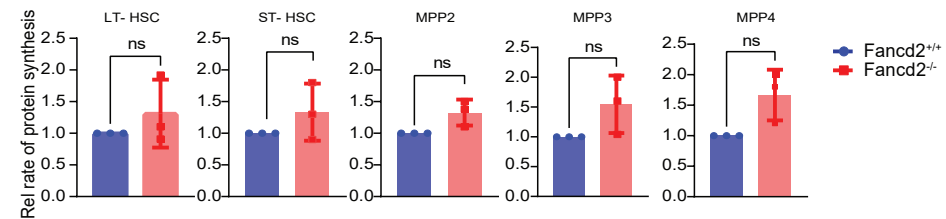

E

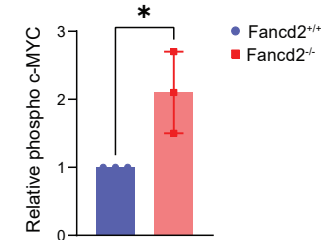

F

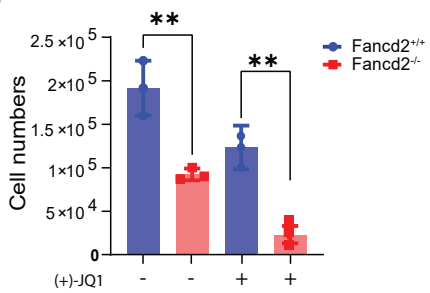

## Kovuru et al., Supplementary Figure Legends

**Supplementary Fig. S1: Flow cytometry gating strategy for HSPCs and transplantation analysis of E12.5 Fetal liver cells. (A)** Representative flow-cytometry gating strategy for HSPC subpopulation analysis with surface staining markers. **(B)** Peripheral blood chimerism after serial transplantation using  $5 \times 10^5$  E12.5 FL  $\text{Fancd2}^{+/+}$  (n=10 mice) and  $\text{Fancd2}^{-/-}$  (n=6 mice). Chimerism of total CD45 (left panel), -myeloid  $\text{Mac1}^{+}\text{Gr1}^{+}$  (mid panel), and -lymphoid  $\text{CD220}^{+}\text{CD3}$  (right panel) populations 9 weeks after primary transplantation (upper panels). Chimerism 9 weeks after secondary transplantation from  $\text{Fancd2}^{+/+}$  (n=6 mice) or  $\text{Fancd2}^{-/-}$  (n=6 mice) donors (lower panels). Welch's t-test for statistical analysis, \* $P < 0.05$ , \*\* $P < 0.01$ , \*\*\* $P < 0.001$ , \*\*\*\* $P < 0.0001$ . Source data are provided as a Source Data file.

**Supplementary Fig. S2: Fetal liver niche cell composition and lineage trajectory analysis.**

**(A)** Dot plot showing the expression pattern of marker genes used for identification of hematopoietic subpopulations. **(B)** t-SNE plots illustrating the fetal liver niche cell gene expression pattern of specific marker genes. **(C)** t-SNE plot showing the global fetal liver niche for Kupffer (M1 and M2) cells, mesenchymal cells, hepatoblasts, hepatocytes, cholangiocytes, and hepatic stellate cells. **(D)** GSEA analysis shows  $\text{Fancd2}^{-/-}$  mesenchymal cell enrichment for "Response to Interferon- $\gamma$ " and "Interleukin-4", and  $\text{Fancd2}^{-/-}$  hepatoblast enrichment for "Innate immune response" and "Response to interleukin-4". **(E)** Overlay of  $\text{Fancd2}^{+/+}$  and  $\text{Fancd2}^{-/-}$  mesenchymal and endothelial cell trajectory analyses. **(F)** Differentiation trajectory analysis of  $\text{Fancd2}^{+/+}$  and  $\text{Fancd2}^{-/-}$  hepatoblast. Source data have been deposited in Gene Expression Omnibus (GEO) with accession number: GSE173908. Source data are provided as a Source Data file.

**Supplementary Fig. S3: Validation of TPE-MI staining in BM cells and analysis of cell count**

**in  $\text{Ifnar1}^{-/-}$  -  $\text{Fancd2}^{-/-}$  crosses. (A)** TPE-MI fluorescence (unfolded protein levels) increases in BM lineage-negative cells after Thapsigargin-induced endoplasmic reticulum stress conditions compared to untreated cells (n=3, t-test for statistical analysis). **(B)** Combined removal of functional  $\text{Ifnar1}$  and  $\text{Fancd2}$  ( $\text{Ifnar1}^{-/-}$   $\text{Fancd2}^{-/-}$ ) alleles severely affect total FL cell counts.  $\text{Ifnar1}^{+/+}$   $\text{Fancd2}^{+/+}$  (embryo numbers: n=36/8),  $\text{Ifnar1}^{+/+}$   $\text{Fancd2}^{-/-}$  (n=17/8),  $\text{Ifnar1}^{+/-}$   $\text{Fancd2}^{+/+}$  (n=33/),  $\text{Ifnar1}^{+/-}$   $\text{Fancd2}^{-/-}$  (n=15/10),  $\text{Ifnar1}^{-/-}$   $\text{Fancd2}^{+/+}$  (n=10/3) and  $\text{Ifnar1}^{-/-}$   $\text{Fancd2}^{-/-}$  (n=6/3). **(C)** KSL Frequency in FL of

$lfnar1$  and  $Fancd2$  genetic combinations showing. **(D)** Representative images of E14.5  $Fancd2^{+/+}$ ,  $Fancd2^{-/-}$ ,  $lfnar1^{+/+} Fancd2^{-/-}$ , and  $lfnar1^{-/-} Fancd2^{-/-}$  embryos. **(E)**  $Fancd2^{+/+} l^{+/+}$  versus  $Fancd2^{-/-}$  ST-HSCs comparison of: total c-MYC protein analysis (upper panel) between  $Fancd2^{+/+}$  (n=5/3) and  $Fancd2^{-/-}$  (n=6/3), the relative rate of protein synthesis (middle panel) between  $Fancd2^{+/+} l^{+/+}$  (n=5/3) and  $Fancd2^{-/-}$  (n=6/3), and unfolded proteins (bottom panel) between the  $Fancd2^{+/+} l^{+/+}$  (n=18/5) and  $Fancd2^{-/-}$  (n=10/5). **(F)**  $lfnar1^{+/+} Fancd2^{+/+} l^{+/+}$  versus  $lfnar1^{+/+} Fancd2^{-/-}$  ST-HSCs comparison of total c-MYC (upper panel) between  $lfnar1^{+/+} Fancd2^{+/+}$  (n=5/3) and  $lfnar1^{+/+} Fancd2^{-/-}$  (n=5/3), the relative rate of protein synthesis (middle panel) between  $lfnar1^{+/+} Fancd2^{+/+} l^{+/+}$  (n=17/5) and  $lfnar1^{+/+} Fancd2^{-/-}$  (n=7/5), with unfolded proteins in the (bottom panel) comparison between the  $lfnar1^{+/+} Fancd2^{+/+} l^{+/+}$  (n=17/3) vs  $lfnar1^{+/+} Fancd2^{-/-}$  (n=8/3) ST-HSCs. **(G)** Analysis of unfolded proteins from  $Fancd2^{+/+} l^{+/+}$  (n=19/4), and  $Fancd2^{-/-}$  (n=6/4) fetal liver ST-HSCs immediately following recovery from TUDCA-injected pregnant  $Fancd2^{+/+}$  mice. **(H)** ST-HSCs unfolded proteins analysis as in G, but fetal liver samples from TUDCA-injected  $Fancd2^{+/+}$  mice were placed in 18 hours of ex vivo culture in the absence of TUDCA before analysis. One-way ANOVA was used for statistical analysis unless mentioned specifically. \*P<0.05, \*\*P<0.01, \*\*\*P<0.001, \*\*\*\*P<0.0001 and ns: non-significant. Source data are provided as a Source Data file.

**Supplementary Fig. S4: Bile acid (TUDCA) supplementation improves  $Fancd2^{-/-}$  cell peripheral blood chimerism, and gene expression of endoplasmic reticulum-associated degradation (ERAD) genes, unfolded protein response, and interferon receptor genes in publicly available human FA HSPCs dataset.** **(A)** Cell proliferation kinetics comparing  $Fancd2^{+/+}$  and  $Fancd2^{-/-}$  BM LT-HSCs during ex vivo expansion. **(B)** Unfolded protein analysis in ex vivo expanded adult BM  $Fancd2^{+/+}$  (n=3 mice),  $Fancd2^{-/-}$  (n=3 mice) HSPCs subsets. t-test was used for statistical analysis. **(C)** Transient gains in peripheral blood chimerism of  $Fancd2^{-/-}$  cells in recipient mice after competitive transplantation of whole bone marrow  $Fancd2^{+/+}$ ,  $Fancd2^{-/-}$  cells followed by injection of PBS (n=6 mice) or TUDCA (n=6 mice, t-test for statistical analysis). Schematic Figure was created with [BioRender.com](https://BioRender.com) released under a [Creative Commons Attribution-NonCommercial-NoDerivs 4.0 International license](https://creativecommons.org/licenses/by-nc-nd/4.0/). **(D)** Heatmap showing the expression profile of endoplasmic reticulum-associated degradation (ERAD) and unfolded protein response genes in human FA patients HSPCs vs healthy group, data was extracted from GEO data set (GSE157591). **(E)** Increased expression of Interferon- $\alpha$  receptor-1 (IFNAR1), Interferon- $\alpha$  receptor-2 (IFNAR2), and Interferon- $\gamma$  receptor-2 (IFNGR2) in human FA patients HSPCs compared to healthy HSPCs (GSE157591). Data are represented as mean  $\pm$ SD. P-values of 0.01 - 0.05 were considered significant (\*), 0.001 - 0.01 (\*\*) p>0.05 were considered non-significant (ns), t-test for statistical analysis. Source data are provided as a Source Data file.

**Supplementary Fig. S5: Analysis of MYC protein in adult BM cells and MYC target gene expression in fetal liver Fancd2<sup>-/-</sup> HSPCs. (A)** Flow cytometry plots for identification of LT-HSCs from Fancd2<sup>+/+</sup>, Fancd2<sup>-/-</sup>, Ifnar1<sup>+/+</sup> Fancd2<sup>-/-</sup> fetal livers and Fancd2<sup>-/-</sup> fetal livers harvested from TUDCA-injected pregnant mice. **(B)** MYC target profiling in Fancd2<sup>+/+</sup> (n=12/7), Fancd2<sup>-/-</sup> (n=11/7) fetal liver KSL cells using “RT2 MYC profiler” PCR array. Results were normalized to Fancd2<sup>+/+</sup> and plotted as relative mean fold change for each target. **(C)** Relative levels of total MYC protein in age-matched adult BM LT-HSCs and HSPCs between Fancd2<sup>+/+</sup> (n=3 mice) and Fancd2<sup>+/+</sup> (n=3 mice) conditions. **(D)** Rate of protein synthesis by in vivo OPP assay in age-matched Fancd2<sup>+/+</sup> (n=3 mice) and Fancd2<sup>-/-</sup> (n=3 mice) adult BM HSPC subsets, t-test for statistical analysis in Figure panels C and D. \*P<0.01, \*\*P<0.001, \*\*\*P<0.001, \*\*\*\*P<0.0001. **(E)** Phosphorylated c-MYC flow cytometry analysis in day 10 ex vivo expanded (under stress conditions) adult BM HSPCs, Fancd2<sup>+/+</sup> (n=3 mice) and Fancd2<sup>-/-</sup> (n=3 mice), t-test for statistical analysis. **(F)** Analysis of total cell numbers in day 10 ex vivo expanded BM LT-HSCs treated with 250uM (+)-JQ1 on day 7 of culture; Fancd2<sup>+/+</sup> (n=3 mice) and Fancd2<sup>-/-</sup> (n=3 mice), (+)-JQ1 treated Fancd2<sup>+/+</sup> (n=3 mice) and (+)-JQ1 treated Fancd2<sup>-/-</sup> (n=3 mice) t-test was used for statistical analysis, \*\*P<0.001. Source data are provided as a Source Data file.

## Supplementary Table 1

Antibody details with manufacturer's and catalog number details.

| Antibody               | Manufacturer Catalog No.         | Dilution | Usage         |
|------------------------|----------------------------------|----------|---------------|
| B220 APC               | Biolegend 103211                 | 1:250    | Lineage (Lin) |
| B220 PE                | BD 12-0452-82                    | 1:250    | Lineage (Lin) |
| B220/CD45R FITC        | Biolegend 103205                 | 1:100    | Lineage (Lin) |
| CD117 APC              | BD 17-1171-82                    | 1:100    | c-kit         |
| CD117 BUV395           | BD Biosciences 564011            | 1:100    | c-Kit         |
| CD117 BV785            | Biolegend 105841                 | 1: 100   | c-kit         |
| CD117 PE               | Biolegend 105808                 | 1:100    | c-kit         |
| CD11b FITC             | BD Biosciences 561691            | 1:100    | Lineage (Lin) |
| CD135 BV421            | Biolegend 135313                 | 1:100    |               |
| CD150 BV711            | Biolegend 115941                 | 1:100    | SLAM          |
| CD150 PECy7            | Biolegend 115914                 | 1:100    | SLAM          |
| CD3 APC                | Biolegend 100235                 | 1:250    | Lineage (Lin) |
| CD3 PE                 | BD 12-0031-82                    | 1:250    | Lineage (Lin) |
| CD3e FITC              | Biolegend 100305                 | 1:100    | Lineage (Lin) |
| CD4 APC                | Biolegend 100412                 | 1:250    | Lineage (lin) |
| CD4 FITC               | Biolegend 100405                 | 1:100    | Lineage (Lin) |
| CD4 PE                 | BD Biosciences 12-0041-82        | 1:250    | Lineage (Lin) |
| CD48 AF700             | Biolegend 103425                 | 1:100    |               |
| CD48 PerCp-Cy5.5       | Biolegend 103422                 | 1:100    |               |
| CD5 APC                | Biolegend 100626                 | 1:250    | Lineage (Lin) |
| CD5 FITC               | Biolegend 100605                 | 1:100    | Lineage (Lin) |
| CD5 PE                 | BD Biosciences 12-0051-82        | 1:250    | Lineage (Lin) |
| c-MYC                  | Cell Signaling Technology 5605S  | 1:1000   |               |
| Gr-1 APC               | Biolegend 108411                 | 1:250    | Lineage (Lin) |
| Gr-1 FITC              | Biolegend 108405                 | 1:100    | Lineage (Lin) |
| Gr-1 PE                | BD Biosciences 12-5931-82        | 1:250    | Lineage (Lin) |
| IgG (H+L) secondary PE | ThermoFisher Scientific P-2771MP | 1:100    |               |
| IgG-AF488 (anti-mouse) | Thermo Fisher A-21202            | 1:1000   |               |
| IgG-FITC (anti-rabbit) | SANTA CRUZ sc-2012               | 1:1000   |               |
| pChk1 S345             | CellSignalling Technology 2348   | 1:50     |               |
| pMcm2 S108             | Bethyl IHC-00014                 | 1:500    |               |
| pRpa32 S4/S8           | Bethyl A300-245A                 | 1:500    |               |
| APC/ Sca-1             | Biologend 122511                 | 1:100    | Sca-1         |
| APC-Cy7/ Sca-1         | Biolegend 108125                 | 1:100    |               |
| Ter119 APC             | Biolegend 116211                 | 1:250    | Lineage (Lin) |
| TER-119 FITC           | Biolegend 116205                 | 1:100    | Lineage (Lin) |
| Ter119 PE              | BD Biosciences 12-5921-82        | 1:250    | Lineage (Lin) |
| Tgfbr1-APC             | R&D FAB5871A                     | 3:100    |               |

## Supplementary Table 2

Primers and thermocycler conditions used for genotyping and determining the sex of embryos used for single-cell RNA sequencing of murine E13.5 WT and *Fancd2*<sup>(-/-)</sup> fetal livers. Genotyping and SRY primer sequences were received from Dr. Alan D'Andrea and Dr. Sherif Abdelhamad, respectively.

| Primer      | Sequence (5' to 3')              | Function         |          | Thermocycler conditions                                  |
|-------------|----------------------------------|------------------|----------|----------------------------------------------------------|
| FANCD2 2F   | CATGCATATAG<br>GAACCCGAAG<br>G   | WT (forward)     | genotype | 95°C for 15'                                             |
| FANCD2 2R   | CAGGACCTTT<br>GGAGAAGCAG         | Common (reverse) |          | (95°C for 30",<br>60°C for 30",<br>72°C for 50") x<br>35 |
| FANCD2 V76F | CTTGCAAAATG<br>GCGTTACTTAA<br>GC | KO (forward)     |          | 72° for 10'                                              |
| Mouse SRY F | GCTGGGATGC<br>AGGTGGAAAA         | forward          | sex      | standard<br>conditions                                   |
| Mouse SRY R | CCCTCCGATG<br>AGGCTGATATT        | reverse          |          |                                                          |

## Supplementary Table 3

Primer sequences utilized for RT-PCR experiments.

| Target | Species | Sequence                                               |
|--------|---------|--------------------------------------------------------|
| IFN-α  | Mouse   | F- CCTGAGAGAGAAGAAACACAGCC<br>R- TCTGCTCTGACCACYTCCCAG |
| IL-6   | Mouse   | F- CCAAGAGGTGAGTGCTTCCC<br>R- CTGTTGTTCACTCTCTCCCT     |

## Supplementary Table 4

### Commercial assays and reagents

| Assay/reagents                                                  | Source                   | Identification         |
|-----------------------------------------------------------------|--------------------------|------------------------|
| Proteasome-Glo<br>Chymotrypsin- like cell-based<br>assay        | Promega                  | Cat#G8660              |
| MG-132                                                          | Adooq- Bioscience        | Cas# 133407-82-6       |
| O-Propargyl-Puromycin (OPP)                                     | Medchem Source           | Cat#HY-156801CS-6850   |
| Alexa Fluor 555- Conjugated<br>Azide                            | Life Technologies        | Cat #A20012            |
| Click-iT Cell Reaction Buffer Kit                               | Life Technologies        | Cat# C10269            |
| Tetraphenylethene<br>maleimide(TPE-MI)                          | Dr. Yuning Hong          | Custom- Synthesized    |
| Proteostat-Aggresome<br>detection kit                           | Enzo                     | Cat#ENZ-51035-K100     |
| RNeasy plus Micro kit                                           | Qiagen                   | Cat#74034              |
| 2-Mercapto ethanol                                              | Sigma                    | Cat#M3148              |
| Tauroursodeoxycholic acid<br>(TUDCA)                            | Sigma-Aldrich Inc        | Cat#35807-85-3         |
| (+)-JQ1                                                         | Med Chem Express USA     | HY-13030               |
| SYBR™ Green master mix                                          | Thermo fisher-SCIENTIFIC | Cat#A25742             |
| RT <sup>2</sup> Profiler PCR Array                              | QIAGEN                   | Cat# 330231 PAMM-177ZA |
| KAPA Mouse Genotyping Kit                                       | Roche                    | Cat# KK7352            |
| Hot Start Taq Master Mix Kit                                    | Qiagen                   | Cat# 203443            |
| collagenase I                                                   | StemCell Technologies    | Cat# 07416             |
| RBC lysis buffer                                                | Invitrogen               | Cat# 00-4300-54        |
| Propidium Iodide (PI) solution                                  | Miltenyi Biotec          | Cat# 130-093-233       |
| KAPA Library Quantification<br>Kit                              | Roche                    | Cat# 07960336001       |
| Agilent Tape Station - High<br>Sensitivity D1000 Screen<br>Tape | Agilent Tape Station     | Cat# 5067-5584         |

|                               |                      |                |
|-------------------------------|----------------------|----------------|
| Agilent Tape Station Reagents | Agilent Tape Station | Cat# 5067-5585 |
|-------------------------------|----------------------|----------------|
