# Supplementary material for: Deregulated protein homeostasis constrains fetal hematopoietic stem cell pool expansion in Fanconi anemia
Source: Nat Commun. 2024 Feb 29;15:1852. doi: 10.1038/s41467-024-46159-1 (PMC10904799; doi:10.1038/s41467-024-46159-1)
Supplement: Supplementary file 4 — Source Data [file 41467_2024_46159_MOESM4_ESM.xlsx]

## Sheet: Source FILE formatted
Figure-1 A
	Kinetic analysis of fetal liver and BM LT -HSCs frequencies
	During development.
	E12.5			E13.5
	Fancd2 WT	Fancd2 KO		Fancd2 WT	Fancd2 KO
	0.0082	0.00643		0.00524	0.00142
	0.013	0.00866		0.00486	0.00142
	0.00364	0.00643		0.00951	0.00363
		0.00301		0.00586	0.00342
		0.012			0.00161
		0.029
		0.013
	E18.5 BM			P21 BM
	Fancd2 WT	Fancd2 KO		Fancd2 WT	Fancd2 KO
	0.00855	0		0.019	0.00806
	0.00267	0.00472		0.011	0.00296
	0	0		0.00846	0.00415
	0.00308			0.012	0.00343
	0.0078			0.011	0.00557
	0.00446				0.00619
	0.028
	E14.5			E18.5_FL
	Fancd2 WT	Fancd2 KO		Fancd2 WT	Fancd2 KO
	0.019	0.00515		0.014	0.00662
	0.011	0.00369		0.014	0.00496
	0.014	0.00909		0.00151	0.00539
	0.013	0.00628		0.021
	0.014	0.00713		0.035
	0.00998	0.00486		0.028
	0.02			0.036
	0.017
	0.012
	10 weeks BM			30 weeks BM
	Fancd2 WT	Fancd2 KO		Fancd2 WT	Fancd2 KO
	0.013	0.013		0.03	0.027
	0.017	0.012		0.026	0.00806
	0.014	0.01		0.015	0.012
	0.00946	0.012
Figure 1B
Number of LT HSCs/LSKs during development Between Fancd2 WT and KO
	LT-HSCs E12.5			LT-HSCs E13.5
	WT	Fancd2 KO		WT	Fancd2 KO
	206	43.5		342	71.3
	327	58.6		317	71.3
	91.5	43.5		620	182
		20.4		382	172
		81.2			80.9
		196
		88
	LT-HSCs E14.5			LSK E12.5
	WT	Fancd2 KO		WT	Fancd2 KO
	4900	813.98		8300	1290
	2900	1033.92		11600	1960
	3600	939.93		6280	2100
	3400	590.28			1690
	3600	670.17			2230
	2600	456.81			2170
	5188.57				2370
	4410.29
	3113.14
	LSK E13.5			LSK E14.5
	WT	Fancd2 KO		WT	Fancd2 KO
	14300	9040		31131	1034
	16300	7530		24386	3572
	18300	12600		25943	1786
	14300	6030		33726	5170
		8540		38914	5828
				31131	4324
				28537
				23349
				24386
	Figure 1C
Fetal liver and BM MPP2 frequency during development between the genotypes
	MPP2 E12.5			MPP2 E13.5
	WT	Fancd2 KO		WT	Fancd2 KO
	0.017	0.012		0.011	0.00729
	0.035	0.018		0.015	0.00587
	0.015	0.019		0.011	0.014
		0.015		0.00949	0.00382
		0.011			0.00463
		0.00849
		0.00791
	MPP2 18.5 BM			P21 MPP2 BM
	WT	Fancd2 KO		WT	Fancd2 KO
	0.00342	0		0.012	0.012
	0.00134	0		0.00657	0.0065
	0.00202	0		0.00753	0.00593
	0.012			0.0099	0.013
	0.0078			0.012	0.013
	0.00334				0.013
	0.00844
	MPP2 E14.5			MPP2 E18.5
	WT	Fancd2 KO		WT	Fancd2 KO
	0.011	0.00866		0.00138	0.000795
	0.00985	0.011		0.00213	0.00451
	0.00811	0.01		0.000303	0.00628
	0.013	0.00886		0.015
	0.018	0.00858		0.017
	0.014	0.00838		0.016
	0.018			0.017
	0.011
	0.013
	10 Weeks MPP2 BM			30 Weeks MPP2 BM
	WT	Fancd2 KO		WT	Fancd2 KO
	0.00269	0.00966		0.00422	0.00687
	0.00265	0.00353		0.00328	0.00687
	0.00197	0.00832		9.85e-05	0.000801
	0.00256	0.00871
	Figure 1D
	Fetal liver and BM MPP3 and MPP4 frequency
	during development between the genotypes.
	MPP3 and MPP4 E12.5			MPP3 and MPP4 E13.5
	WT	Fancd2 KO		WT	Fancd2 KO
	0.0082	0.00643		0.12	0.11
	0.013	0.00866		0.14	0.089
	0.00364	0.00643		0.16	0.18
		0.00301		0.13	0.069
		0.012			0.11
		0.029
		0.013
	MPP3 and MPP4 E14.5			MPP3 and MPP4 E18.5
	WT	Fancd2 KO		WT	Fancd2 KO
	0.067	0.022		0.12	0.017
	0.049	0.069		0.056	0.012
	0.051	0.051		0.049	0.023
	0.059	0.021		0.17
	0.072	0.025		0.17
	0.051	0.017		0.1
	0.047			0.11
	0.029
	0.039
	MPP3 and MPP4 E18.5 BM			MPP3 and MPP4 P21 BM
	WT	Fancd2 KO		WT	Fancd2 KO
	0.11	0.00776		0.099	0.06
	0.045	0.00708		0.086	0.048
	0.028	0.00363		0.1	0.039
	0.16			0.076	0.075
	0.13			0.11	0.073
	0.045				0.074
	0.13
	MPP3 and MPP4 10 weeks BM			MPP3 and MPP4 30 weeks BM
	WT	Fancd2 KO		WT	Fancd2 KO
	0.15	0.12		0.13	0.048
	0.17	0.081		0.13	0.029
	0.14	0.065		0.026	0.028
	0.13	0.09
Figure 1F and 1G
Cell composition and HSCs trajectory analysis.
Single-cell RNA seq data have been deposited
in Gene Expression Omnibus (GEO) with accession number: GSE173908.
Figure 2B
Frequency of nascent ssDNA
(EdU+ and/or BrdU+) in the Lin-, LSK and LT-HSC: (Fancd2++ n=4, Fancd2-/- n=5).
Lineage negative cells		LSK cells		LT-HSC
WT	KO	WT	KO	WT	KO
81.4	86.2	76.54	89.38	94.13	99.43
82.4	83.8	70.96	84.02	96.78	99.32
75.3	79.1	61.22	76.2	95.26	97.66
77	80.3	70.7	76	98.06	97.44
	81.9		80.23		99.54
Figure 2C
Percentage of cells newly entering S-phase (BrdU+EdU- per EdU+ and/or BrdU+)
Linegae negative cells		LSK cells		LT-HSCs
WT	KO	WT	KO	WT	KO
23.5872	11.7169	11.2882	4.22913	2.4753	0.231319
23.301	16.2291	12.7678	6.45085	2.66584	0.72493
26.0292	19.5954	14.0804	14.3045	7.4113	2.10936
25.0649	24.7821	18.9533	16.0526	4.54824	0.862069
	13.5531		10.5073		3.25497
Figure 2D
p RPA32 S4/S8 Immuno fluorescence analysis in fetal liver HSPCs.
Mean flourescence intensity numbers of nuclei
	Fancd2-WT				Fancd2 KO
	201.5	231.234		198.1	204.74	220.006
202.44	204.6	211.879		198.63	211.18	217.984
205.97	207.61	234.648		188.79	226.88	201.88
208.66	210.23	335.819		209.47	223.27	211.339
204.32	195.53	399.039		210.7	241.15	228.438
193.34	209.21	262.126		215.52	248.29	200.464
202.09	209	358.005		209.52	234	311.673
195.49	218.26	231.463		208.24	223.97	260.108
203.26	208.32	285.914		207.44	220.16	245.452
193.1	223.37	309.654		208.63	210.43	236.7
200.1	197.68	234.096		198.57	213.2	218.601
208.55	211.79	229.903		190.3	238.11	199.651
196.78	210.66	234.243		208.1	233.59	627.135
205.82	205.53	216.835		209.94	224.54	227.527
204.02	201.36	321.244		211.05	220.29	295.154
202.09	198.88	220.386		201.1	238.68	277.8
189.93	207.78	219.772		205.85	240.33	261.342
200.89	209.62	205.187		223.58	224.08	496.794
198.49	205.21	242.209		235.33	226.82	300.808
236.08	210.57	217.505		210.2	215.11	225.295
184.96	210.12	212.47		214.72	234.13	226.916
177.99	229.24	219.241		205.73	232.24	251.375
197.86	213.48	217.61		193.75	228.14	234.589
202.17	213.63	206.783		200.57	240.11	222.374
189.96	222.4	209.394		188.08	223.95	503.378
200.83	214.89	198.727		184.21	228.98	356.616
212.27	214.53	212.118		190.73	232.16	218.474
180.33	202.72	214.914		195.37	220.56	203.319
193.61	232.93	234.272		189.95	236.12	411.236
185.13	223.45	230.579		197.08	233.96	217.942
184.45	229.72	217.54		191.33	240.19	219.344
183.48	227.51	224.892		211.79	244.83	220.33
189.48	230.48	220.949		209.65	252.75	208.301
190.91	226.58	223.821		209.8	349.08	209.29
190.47	220.53	214.17		210.07	279.45	416.615
208.22	227.21	211.963		202.45	563.324	212.003
211.29	252.53	219.402		207.93	283.134
200.67	271.535	209.254			238.895
Figure 2E
Immuno flourescence analysis of pMCM2 S108.
Mean flourescence intensity numbers of nuclei
Fancd2 WT: MFI			Fancd2 KO	Fancd2 KO nuclei MFI
215.49	193.9		310.42	240.14	203.75	202.76
198.55	200.09		295.78	233.22	201.91	203.78
204.05	195.61		277.38	240.42	205.22	216.22
210.58	197.97		303.92	228.27	206	214.29
203.57	194.61		294.51	227.05	218.52	221.13
215.12	198.56		311.49	228.88	202.26	208.76
224.52	196.53		260.77	263.96	209.68	215.99
227.28	250.87		300.09	221.99	208.81	210.38
214.96	205.32		285.13	238.12	201.43	200.49
196.07	196.94		296.88	194.94	221.01	198.02
208.57	202.94		294.81	219.71	206.86	204.14
222.9	246.98		232.7	245.01	207.92	210.32
196.55	244.45		227.74	280.37	193.12	226.84
196.42	231.01		324.87	265.41	220.9	212.12
188.14	252.85		300.78	240.77	206.98	220.56
195.45	214.05		366.26	222.34	197.36	223.14
218.58	239.37		323.5	223.01	214.12	220.45
204.79	208.5		254.72	208.38	226.11	241.21
196.97	213.17		300.99	205.52	222.09	219.04
190.02	211.77		359.66	214.87	202.2	235.68
188.1	200.12		259.23	211.76	262.61	207.2
218.05	194.45		273.54	200.62	248.98	214.44
199	200.83		260.89	195.69	204.76	236.13
212.64			343.35	210.82	234.73
241			276.28	218.88	191.72	223.54
224.68			233.87	232.02	181.29	258.21
200.49			258.89	258.58	195.93	207.32
199.13			279.48	212.47	220.72
212.82			232.32	218.21	261.42
193.29			253.64	224.2	221.85
223.06			271.12	204.66	215.98
196.76			259.06	196.73	214.38
189.8			272.87	203.47	249.1
210.82			274.02	208.3	216.26
215.27			254.02	229.04	220.52
198.39			273.59	232.53	214.34
214.74			234.69	242.43	211.7
207.55			254.82	232.59	216.98
216.29			262.38	206.63	218.38
195.68			229.63	206.27	224.8
211.67			247.6	225.54	209.53
Figure 2F
Immuno fluorescence analysis of pChk1 in E13.5 HSPCs.
Mean flourescence intensity numbers of nuclei
	Fancd2 WT Cells Nuclear MFI			Fancd2 -KO cells Nuclear MFI
353.078	285.873	284.44	385.264	343.414	333.61	305.094
343.506	272.452	286.98	351.558	604.662	322.069	334.936
298.446	262.456	312.041	364.832	512.44	321.725	327.732
304.192	276.488	279.964	356.621	608.965	315.744	293.804
276.763	271.894	281.987	306.679	548.34	301.928	289.32
293.536	286.412	265.044	274.547	416.195	287.434	287.595
293.503	277.746	267.61	265.67	270.388	289.357	280.869
277.466	266.078	265.183	271.853	313.007	269.528	272.231
287.232	281.269	263.293	263.386	316.505	265.546	297.595
291.072	281.62	248.253	281.911	380.552	277.433	284.496
285.375	276.92	279.753	280.934	251.505	298.982	275.864
296.249	277.375	270.43	281.241	270.506	275.753	268.762
284.966	290.035	275.699	296.211	384.02	279.333	269.569
297.752	292.562	296.075	267.806	386.32	267.733	288.003
288.47	280.642	286.768	277.744	340.824	286.062	276.053
286.573	280.731	270.978	302.647	536.557	295.669	273.021
280.25	288.181	274.466	279.44	484.902	284.768	260.278
275.636	279.634	274.191	276.955	455.682	280.969	254.996
270.98	298.089	280.362	275.128	285.334	285.732	277.116
272.189	298.471	270.625	267.417	334.846	284.874	268.584
273.224	282.611	251.577	256.809	389.469	285.666	264.156
285.864	300.803	257.241	258.873	326.693	278.167	281.456
307.322	289.328	251.236	276.811	374.408	294.465	273.513
300.995	297.431	248.372	259.279	380.327	290.141	270.107
296.653	294.779	248.854	271.078	329.207	271.511	265.684
300.732	281.88	427.823	264.916	389.046	289.287	272.45
274.972	281.259	431.937	286.509	382.839	289.883	410.183
277.71	297.302	414.069	262.09	363.682	284.576	582.486
271.138	297.812	382.405	267.473	342.384	278.554	411.866
291.032	291.961	393.631	243.346	568.349	276.986	675.616
279.158	269.835	458.917	260.571	470.793	279.497	446.04
281.489	250.578	394.191	269.574	511.618	269.14	561.015
285.295	260.984	421.855	256.001	429.575	295.015	460.516
276.902	254.327	398.687	251.148	717.853	283.793	520.831
276.703	267.258	392.126	256.001	274.878	292.172	649.66
276.815	284.374	354.548	249.084	380.648	305.814	301.814
265.314	262.655	350.385	294.752
287.68	300.515	352.479	287.805
293.813	291.208	259.012	323.303
285.632	271.084	289.039	298.81
275.705	260.199	264.349	287.073
Figure 2G (E12.5)
Immuno fluorescence analysis of pChk1 in E12.5 HSPCs
Between WT and KO conditions
Mean flourescence intensity numbers of nuclei
740.853	378.306		365.058	358.984
786.729	421.357		501.505	394.029
729.888	505.56		509.794	392.365
1293.41	488.079		475.027	431.026
772.069	365.998		716.425	317.426
756.946	369.669		659.389	344.839
442.5	376.557		650.608	363.469
436.229	422.96		507.912	353.518
402.132	345.769		416.459	377.545
422.247	311.455		472.038	368.681
382.23	308.882		554.68	310.116
390.91	369.519		1244.54	297.142
412.6	384.818		596.95	296.575
434.81	317.351		643.266	284.578
459.915	296.76		734.987	441.072
398.654	352.651		840.314	319.653
423.123	438.579		854.637	329.708
359.355	494.354		816.741	859.611
312.099	445.564		1174.39	347.513
386.044	410.944		927.163	357.085
458.686	466.702		1138.86	387.813
399.042	383.807		791.586	314.18
328.724	423.995		428.863	349.763
323.536			373.878	381.634
427.159			370.347	437.234
404.042			442.899	392.598
419.774			416.546	382.104
374.081			839.392	346.901
439.178			607.381	322.909
377.122			522.597	399.389
356.681			373.497	379.492
329.137			377.58	259.851
331.327			467.541	408.265
434.448			326.274	495.854
388.123			366.364	424.239
568.466			503.685	370.09
407.813			522.457	381.739
415.258			536.776	386.607
399.135			437.377	423.625
392.055			462.733	410.086
			433.197
Figure 2G (8 weeks)
	Immuno fluorescence analysis of pChk1 in HSPCs between WT and KO.
	Mean flourescence intensity numbers of nuclei
	WT 8 Weeks
0.496245	1.42695	0.994844	1.90271
0.673144	1.01275	1.04437	0.663661
0.396164	0.991346	0.88336	0.9505
0.343872	0.478993	1.26632	1.20739
0.366999	1.10087	0.913827	1.29021
0.550516	1.13983	1.19247	1.4842
0.494608	0.821076	1.11746	1.22441
0.568014	0.917491	1.09702	1.24699
0.941324	0.888566	1.24762	0.799866
0.830941	1.0465	0.831874	0.738125
1.2999	0.947573	1.78157	0.66506
0.804062	0.982668	1.20982	0.67485
0.816853	0.834381	1.33651	0.798229
1.84502	0.805649	1.813	0.640364
1.61443	0.525658	2.22142	0.822857
1.24072	1.03435	0.639621	0.920039
0.557338	0.814905	1.11206	0.996891
0.518758	0.743172	0.768047	0.757466
1.21605	0.540313	1.26632	0.798672
1.68753	0.589485	0.913827	1.0267
1.4945	0.913249	1.19247	0.875968
0.973661	0.64772	1.11746	0.910454
0.706266	0.716754	1.09702	0.932864
0.38692	0.805071	1.24762	1.0456
0.621978	0.798321	0.831874	1.31474
0.469025	0.962181	1.78157	0.994844
0.309897	0.826809	1.20982	1.04437
0.550447	1.14907	0.822857	0.88336
0.886167	1.06807	0.920039
1.02384	0.845403	0.996891
1.72662	0.795336	0.757466
1.70725	1.03656	0.798672
1.41359	0.888164	1.0267
1.40063	0.837589	0.875968
0.816853	0.513776	0.910454
3.35491	0.715929	0.932864
1.79014	0.798229	1.0456
1.42116	0.640364	1.31474
Figure 2G (8 weeks)
	Immuno fluorescence analysis of pChk1 in HSPCs between WT and KO.
	Mean flourescence intensity numbers of nuclei
	KO 8 Weeks
0.59417	1.278	1.45552
0.393427	1.80903	1.15306
0.507139	2.16211	1.24045
0.413483	1.49571	1.53073
0.808343	0.929947	1.42705
0.718805	1.02437	1.12405
0.692481	1.35762	1.13891
0.599542	1.87324	1.6996
0.586827	1.77908	1.88816
0.721671	1.6453	2.17432
0.411334	0.81317	2.2284
0.287415	0.971116	2.02265
0.356717	0.755976	2.68719
0.455208	0.96985	1.45247
0.48386	0.975747	2.03429
0.379996	1.28784	1.56851
0.690154	0.891854	2.32582
0.376415	1.08641	2.34516
0.35797	0.610366	0.524689
0.685319	0.988951	0.434793
0.564801	0.73181	0.398083
0.675469	0.882231	0.69463
0.757844	0.987178	0.828578
0.673321	0.83853	0.666516
0.906118	0.48809	0.715224
0.674395	0.514391	0.542059
0.969331	0.976723	0.77396
0.779512	0.88205	0.411513
0.697496	0.815341	0.867437
0.817117	0.879771	1.26015
0.7625	0.536747	0.886777
0.513631	0.562396	1.29757
1.04654	2.35268	1.33679
1.79021	0.312843
Figure 3A
Shematic illustration of the experimental process and molecular analysis in this figure.
This figure is made on https://www.biorender.com and ganted licence for publication.
Figure 3B
	OPP(O-propargyl-puromycin assay) to determine rate of protein synthesis.
	normalized MFI Median flourescent intensity values with respective dam BM HSPCs MFIs.
		LT-HSC
	WT/Het fetal liver(n=18 embryos)	KO fetal liver (n=10 embryos)	Dam BM (n=5 mice)
	1.94968	2.77999	1
	2.24634	2.24166	1
	1.90345	1.84026	1
	1.5828	2.27217	1
	2.01346	2.7816	1
	1.72949	1.82151
	2.30543	1.77113
	1.72949	3.39517
	1.79933	2.32547
	2.02689	3.9
	1.1652
	1.27489
	1.20477
	1.28471
	2.12763
	1.30645
	2.40954
	1.84362
	MPP2
	WT/Het fetal liver(n=18 embryos)	KO fetal liver (n=10 embryos)	Dam BM( n=5 mice)
	1.53398	1.54986	1
	2.0293	2.02076	1
	1.6044	1.63777	1
	1.55596	1.99959	1
	1.41138	1.75245	1
	1.41138	1.52126
	1.41432	1.74453
	1.28113	3.2
	1.78151	2.65396
	1.22981	2.23585
	2.82226
	1.81003
	2.12192
	2.16052
	1.84253
	1.60633
	1.84253
	1.60633
OPP(O-propargyl-puromycin assay) to determine rate of protein synthesis.
	MPP3
WT/Het fetal liver (n=18 embryos)	KO fetal liver (n=10 embros)	Dam BM(n=5 mice)
1.58954	1.63944	1
1.16522	1.44185	1
1.18994	1.44301	1
1.31147	1.19477	1
1.49664	1.29942	1
1.77051	1.43478
1.3281	1.92291
1.53608	1.76318
1.65074	2.47199
1.04366	2.03213
1.02516
1.13567
1.59573
1.08917
1.8775
1.6528
1.6528
1.13521
OPP(O-propargyl-puromycin assay) to determine rate of protein synthesis.
	MPP4
WT/Het fetal liver (n=18 embryos)	KO fetal liver(n=10 embryos)	BM(n=5 mice)
1.2217	1.23978	1
1.08307	1.30949	1
1.09434	1.22956	1
1.1989	2.54376	1
0.667091	1.22677	1
0.600866	1.15785
1.72694	1.03289
1.00926	1.27931
0.707052	1.90196
1.718	1.68416
1.00832
1.27931
1.10009
1.00601
1.10009
1.20646
1.96208
1.30981
Figure 3C
Analysis of unfolded proteins by TPE-MI(Tetra phenylethene maleimide) assay.
	LT-HSC
Normlaized MFI numbers with respective BM samples
Fancd2 WT/Het (n=12 Fetal liver cells)	Fancd2 KO (n=9 fetal liver cells)	BM(n=3 mice)
0.381913	1.15994	1
0.576981	1.39163	1
0.585949	2.478	1
0.497758	2.282
3.164	4.378
1.74	4.198
1.5	3.424
1.47	2.052
1.23	2.344
1
1.586
2.194
	MPP2
Normalized MFI numbers with respective BM HSPCs MFI values
Fancd2 WT/Het Fetal liver cells	Fancd2 KO fetal liver cells	BM (n=3 mice)
0.965352	2.89606	1
2.05735	2.96296	1
1.28009	2.80287	1
1.02741	2.84982
0.771156	2.22527
1.15495	1.79142
2.23719	1.44577
1.45161	2.03106
0.845878	1.47192
1.1601
1.01434
2
	Figure 3C
		MPP3&4
	Normlaized MFI numbers with respective BM samples
	Fancd2 WT/Het (n=2 fetal livers)	Fancd2 KO(n=9 fetal livers)	BM (n=3 mice)
	1.00101	2.75887	1
	1.82776	2.30497	1
	1.09625	1.74772	1
	0.974671	1.21479
	0.782168	0.862209
	1.5461	2.05167
	0.934144	1.8075
	1.25127	1.21479
	0.842958	2.07497
	1.08815
	1.54992
	1
Figure 3D
		Proteasome activity
Fetal liver cells proteasome activity luminiscence values was normalised to BM KSL numbers
BM KSL tretaed with MG132 proteasome inhibitor was used as negative control
		Fetal liver
	BM KSL +MG312( n=5)	Fancd2 WT/Het fetal liver KSL(n=31 embryos)	KO fetal liver KSL(n=6 embryos)	BM KSL (n=5)
	0.25	1.7021	1.22099	1
	0.34	2.15187	1.14365	1
	0.165625	1.48131	1.24065	1
	0.123	2.59229	3.03842	1
	0.525123	1.64365	2.62562	1
		2.17403	2.29852
		1.98066
		1.90608
		1.61602
		1.68508
		4.89687
		4.24688
		4.73125
		2.65937
		1.79688
		2.15313
		1.63437
		2.05
		1.31875
		1.75937
		1.41875
		3.19606
		2.28769
		2.29458
		3.09458
		2.1734
		2.90542
		2.15763
		2.4867
		2.20788
		1.95074
	Figure 3E
	% cells containing aggresomes
	For each experimental replicate, 50 cells were considered.
	Cells were counted based on proteostat die positivity.
	WT/Het (n=4 fetal livers)	KO (n=4 fetal livers)
	22	40
	25	38
	23	35
	28	39
Relative aggregated proteins normalized to respective WT control values.
	WT(n=4 fetal livers)	KO (n=4 fetal livers)
	1	1.52
	1	1.81818
	1	1.52174
	1	1.39286
	Figure 3F
	Fancd2 embryo weights on day E14.5
	WT/Het(n=10 Embryos)	KO(n=7Embryos)
	279.6	243
	300	258
	287	220
	237	265
	265	225
	273	223
	268	224
	247
	263
	274
	Figure 3H
	Embryos weights and fetal liver LT-HSCs numbers from TUDCA received pregnant mice
	TUDCA received embryo weights on Day 14.5		LT-HSC Numbers on Day 14.5
	WT/Het(n=19 embryos)	KO(embryos n=6)	WT/Het(n=19 embryos)	KO(embryos n=6)
	300	243	219	283
	287	220	235	210
	237	265	289	133
	265	325	280	170
	273	250	283	218
	268	255	240	182
	247		133
	263		244
	274		186
	220		177
	265		218
	225		182
	223		211
	268		138
	247		281
	263		400
	274		503
	220		213
	250		216
	Figure 3I
	Unfolded proteins analysis in TUDCA exposed LT-HSCs
	Normlaized MFI numbers with respective BM samples
		LT-HSC
	WT/HET(n=19 fetal livers)	KO(n=6 fetal livers)	BM(n=4mice)
	1.24094	1.3579	1
	1.36608	1.27836	1
	1.14152	2.05148	1
	1.68211	2.16988	1
	1.63192	1.39931
	1.27413	1.70222
	1.75418
	1.6731
	1.1
	1.20139
	1.18316
	1.11719
	1.10938
	1.46962
	0.865497
	0.833918
	0.984795
	2.41444
	1.5
Figure 3I
	MPP2
WT/HET(n=19 fetal livers)	KO(n=6 fetal livers)	BM(n=4 mice)
1.16771	1.08386	1
1.27673	1.74738	1
1.04193	1.30608	1
1.51782	2.00229	1
0.969602	2.29324
1.12369	1.27509
0.819252
1.3555
1.11482
1.20071
1.34297
1.5577
1.51782
1.16771
1.27673
1.04193
0.969602
1.12369
1.09301
	MPP3+MPP4
WT/HET(n=19 fetal livers)	KO(n=6 fetal liver)	BM(n=4 mice)
1.39136	1.93848	1
1.65969	1.52225	1
1.14529	3.68392	1
1.80785	2.90909	1
1.19634	2.57788
1.41099	1.9328
2.34545
1.89231
1.33566
1.69917
2.4
1.68252
1.43639
1.79429
1.67301
1.78044
1.89554
1.49634
1.55755
Figure 3J
18 hours ex vivo culture in the absence of TUDCA
Normlaized MFI numbers with respective BM samples
	LT-HSC
WT/Het(n=9 embryos)	KO(n=4 embryos)	BM (n=3 mice)
6.40234	11.2515	1
3.7076	10.4012	1
4.4538	4.4269	1
6.55439	4.19883
1.93918
1.43041
1.88187
3.49942
1.47719
	MPP2
WT/Het(n=9 Embryos)	KO(n=4 Embryos)	BM( n=3 mice)
2.25157	4.99057	1
1.45073	4.36792	1
1.95702	7.13173	1
3.38994	9.85109
1.2673
6.75831
4.11226
4.41581
5.7606
	MPP3&4
WT/Het(n= 9 fetal livers)	KO(n=4 fetal livers)	BM(n= mice)
3.2	3.10231	1
1.45073	8.0123	1
3.1	7	1
3.38994	10.5
3.5
6.75831
4.11226
4.41581
7.7606
Figure 4A
Flow cytometry analysis of endogenous c-MYC between WT and KO fetal liver HSPCs.
Fetal liver MFI(Median fluorescence intensity) values were normalized with respective dam
BM HSPCs MFIs.
	LT-HSCs
Fetal liver		Dam
WT/Het(n=6 embryo)	KO(n=6 embryo)	BM(n=3mice)
3.32	5.84	1
2.04	4.17	1
3.88	5.97	1
3.62	5.73
3.6	6.05
3.56	5.25
	MPP2
Fetal liver		Dam
WT/Het(n=6)	KO(n=6)	BM(n=3 mice)
4.07448	6.16038	1
4.1718	3.24826	1
2.61768	3.84508	1
2.44439	2.74925
3.023	3.73883
2.99	5.4146
	MPP3
Fetal liver		Dam
WT/Het(n=6 embryos)	KO(n=6 embryos)	BM(n=3 mice)
4.97543	6.34241	1
5.20085	6.71581	1
2.74145	4.01603	1
3.19551	4.97062
4.123	4.28098
3.98	3.82746
Figure 4A
	MPP4
Fetal liver		Dam
WT+Het(n=6 Embryo)	KO(n=6 embryos)	BM(n=3 mice)
3.11	5.83091	1
3.25	4.36618	1
2.28218	3.49309	1
3.35527	3.12909
2.78	3.95491
3.29	4.34945
Flow cytometry analysis of endogenous c-MYC between WT and KO fetal liver HSPCs.
Fetal liver MFI(Median fluorescence intensity) values were normalized with respective dam
BM HSPCs MFIs.
Figure 4B and C
Single-cell RNA seq data have been deposited in Gene Expression Omnibus (GEO)
with accession number: GSE173908.
Figure 4E
Immunofluorescence (IF) of pChk1-S345 in Fancd2+/+ and Fancd2-/- MEFs.
both basal conditions and under experimental replication stress conditions (hydroxyurea (HU).
Mean fluorescent intensity values normalized to Fancd2 WT DMSO treated (control) cells.
Fancd2 WT + DMSO	Fancd2 WT+ HU	Fancd2KO + DMSO	Fancd2 KO + HU
1	3.07967	0.599766	2.13
1	3.02049	0.936694	2.5
1	2.10001	0.630791	3
1	3.11964	0.416579	3.3
1	2.40204	1.02154	5.02
1	3.83529	1.10198	2.09
1	1.60814	0.55943	1.92
1	1.87568	2.27066	2.98
1	1.4695	2.01	3.45
1	1.2864	1.09	4.02934
1	1.3421	0.768594	4.53
1	3.51984	0.89504	2.9844
1	1.09864	1.01	1.98
1	1.23718	1.235	1.95
1	1.22789	0.577694	2.00192
1	1.984	1.12	3.094
1	1.034	1.023	2.94
1	1.283	2.19	1.893
1	2.1982	0.99	4.52
1	2.00931	1.45	2.0498
1	1.99832	0.874	1.985
1	1.87568	0.9847	2.095
1	1.994	1.29393	3.192
1	1.297	1.12838	3.593
1	1.393	1.03948	2.0895
Figure 4F
		IFN-α
	Gene expression analysis of IFN-α and IL-6 by real time PCR
Gene expression values of Real-time PCR normalized with WT untreated MEFs,
		MEFs
Target gene	WT( n=4)	KO( n=4)	WT+HU( n=4)	KO+HU( n=4)
IFN-α	1	1.3	1.35	2
IFN-α	1	0.7	1.26	1.56
IFN-α	1	1	1.18	1.74
IFN-α	1	1.021	1.087	1.48
		(n=4 independent experiments)
	HU (Hydroxy urea)
		IL-6
Gene expression values of Real time PCR normalized with WT untreted MEFs
		MEFs
Target gene	WT( n=4)	KO ( n=4)	WT+HU( n=4)	KO+HU(( n=4)
IL-6	1	1.28	1.5	1.97
IL-6	1	1	1.16	1.68
IL-6	1	0.8	0.8	1.56
IL-6	1	1.18	1.17	1.48
	(n=4 independent experiments)
Figure 4G
		C MYC analysis by flowcytometry
Normalized median fluorescence intensity (MFI) values with respective WT untreated
control samples.
WT untreated (n=4)	KO untreated (n=4)	WT+HU(n=4)	KO+HU(n=4)	WT+MG132(n=4)
1	1.17729	1.90129	3.26832	2.48921
1	1.13695	1.69638	2.01686	1.76677
1	0.605083	1.18874	2.42407	1.32104
1	1.21016	1.69638	2.01686	1.61812
1	1.51271	3.06664	3.95587	2.01686
Flow cytometric analysis of MYC levels in Fancd2+/+ and Fancd2-/- MEFs
Under both basal and replication stress (HU: 200μM ) conditions.
Using proteasome inhibitor MG132 (2μM final concentration) as a positive control.
Figure 5B
Endogenous e MYC analysis by flow cytometry and normalized MFI values.
	LT-HSCs
Ifnar Het	Ifnar Het
Fancd2-WT/He	Fancd2-KO	Dam
(n=5 fetal livers)	n=5 fetal livers	BM(n=3 mice)
4.37	5.06	1
4.67	4.7	1
4.8	4.16	1
4.4	3.9
4.2	4.1
	MPP2
Ifnar Het	Ifnar Het
Fancd2-WT/He	Fancd2-KO	Dam
(n=5 fetal livers)	n=5 fetal livers	BM(n=3 mice)
4.224	2.9923	1
4.1023	3.495	1
3.985	3.98	1
2.994	4.2
3.5034	3.985
	MPP3
Ifnar Het	Ifnar Het
Fancd2-WT/He	Fancd2-KO	Dam
(n=5 fetal livers)	n=5 fetal livers	BM(n=3 mice)
3.1984	4.32	1
3.984	3.201	1
4.123	4.2	1
4.234	4.983
4.6	3.89
	MPP4
Ifnar Het	Ifnar Het
Fancd2-WT/He	Fancd2-KO	Dam
(n=5 fetal livers)	n=5 fetal livers	BM(n=3 mice)
3.156	3.3405	1
2.9985	4.203	1
3.564	3.0943	1
4.0935	2.8753
2.8675	2.7653
Figure 5C
Rate of protein synthesis by in vivo OPP assay.
Fetal liver samples MFI( Median fluorescent intensity).
Normalized with respective BM HSPC subsets MFIs.
	LT-HSC
Fancd2-WT/HET	Fancd2- KO
Ifnar1 Het	Ifnar1 Het fetal livers)	Dam (n=3 mice)
n=17 fetal Liver	n=7fetal Liver	BM
2.58068	3.17835	1
2.28038	3.46227	1
2.73157	2.43101	1
2.67605	2.18894	1
3.626	2.20433
2.70792	1.86233
2.03817
1.8607
1.98995
2.10568
2.07005
2.73157
2.67605
2.10832
2.69055
2.48907
Figure 5C
Rate of protein synthesis by in vivo OPP assay.
	MPP2
Fancd2-WT/HET	Fancd2- KO
Ifnar1 Het	Ifnar1 Het fetal livers)	Dam (n=3 mice)
n=17 fetal Liver	n=7fetal Liver	BM
1.49398	2.21754	1
1.58022	2.16273	1
1.5839	2.77311	1
1.64056	1.82349	1
1.71142	2.09124
1.65216	1.8234
1.57367
1.91885
1.92941
1.91633
2.15674
2.27616
2.01693
1.84102
2.00564
1.84102
Figure 5C
MPP3
Fancd2-WT/HET	Fancd2- KO
Ifnar1 Het	Ifnar1 Het fetal livers)	Dam (n=3 mice)
n=17 fetal Liver	n=7fetal Liver	BM
2.13857	1.0611	1
1.94444	2.06636	1
1.9854	2.45604	1
1.93092	1.20458
1.93092	2.4762
2.0653
1.78468
1.71443
2.86089
2.22207
2.15241
2.25858
3.11014
1.52677
0.679634
Figure 5C
Rate of protein synthesis by in vivo OPP assay.
	MPP4
Fancd2-WT/HET	Fancd2- KO
Ifnar1 Het	Ifnar1 Het fetal livers)	Dam (n=3 mice)
n=17 fetal Liver	n=7fetal Liver	BM
2.27465	2.43379	1
2.04201	2.89729	1
2.04201	2.63075	1
2.26794	2.57404	1
2.14417	1.92754	1
1.21954	2.22273
2.10454	1.63759
2.46773
2.24677
2.15927
2.08466
1.37503
1.32574
2.08129
1.63759
1.56365
2.36861
Figure 5D
Analysis of unfolded proteins by TPE-MI assay
Fetal liver samples MFI( Median fluorescent intensity)were normalized
with respective BM HSPCs MFI values.
	LT-HSCs
Fancd2-WT/HET	Fancd2- KO
Ifnar1 Het	Ifnar1 Het fetal livers)	Dam (n=3 mice)
n=17 fetal Liver	n=8fetal Liver	BM
1.41276	0.725766	1
0.66823	1.08667
1.28924	2.39655
0.839587	4.44828
0.698249	2.84558
1.86304	1.46145
2.64224
2.71983
3.10345
2.5431
1.90948
1.60352
2.13546
1.17511
1.30617
Figure 5D
Analysis of unfolded proteins by TPE-MI assay
Fetal liver samples MFI( Median fluorescent intensity)were normalized
with respective BM HSPCs MFI values.
	MPP2
Fancd2-WT/HET	Fancd2- KO
Ifnar1 Het	Ifnar1 Het fetal livers)	Dam (n=3 mice)
n=17 fetal Liver	n=8fetal Liver	BM
1.17273	1.50227	1
1.5	0.904545	1
0.726136	1.30341	1
1.03182	0.509956
0.944318	1.20771
0.877273	0.794802
0.782955	1.28636
1.18969	2.84659
0.878167
1.09034
0.522951
0.522951
0.997904
0.635925
1.41731
1.11591
0.981818
Figure 5D
Analysis of unfolded proteins by TPE-MI assay
Fetal liver samples MFI( Median fluorescent intensity)were normalized
with respective BM HSPCs MFI values.
	MPP3&4
Fancd2-WT/HET	Fancd2- KO
Ifnar1 Het	Ifnar1 Het fetal livers)	Dam (n=3 mice)
n=17 fetal Liver	n=8fetal Liver	BM
2.03387	2.39355	1
2.46129	2.77097	1
1.29032	1.40806	1
1.4871	0.845
1.34032	1.10044
1.24516	1.2617
1.32419	4.34194
1.43871	2.02903
1.61998
0.952669
1.5
0.804073
1.35195
1.5754
1.40726
2.36129
3.07419
Figure 5F
Fancd2-WT vs Fancd2-KO (Fetal liver cells CFU assay)
number of colonies formed from 60 K whole fetal liver cells.
n=5 fetal livers	n=5 fetal livers
Fancd2 WT	Fancd2 KO
46	38
44	30
53	39
39	32
43	30
Figure 5F
Fancd2-WT vs Fancd2-KO (BM CFU assay)
number of colonies formed from 5K BM lineage depletd cells.
BM CFU Assay
n=5 mice	n=5 mice
Fancd2 WT	Fancd2 KO
82	60
93	63
109	80
Ifnar-Het (+/-) Fancd2 Fetal liver CFU
Number of colonies formed with 60K whole fetal liver cells.
Ifnar 1 Het
Fancd2 WT)	Fancd2-KO
51	29
46	38
44	30
53	39
39	42
43	50
38	50
41	33
48	38
IFNAR het-Fancd2-WT vs Fancd2-KO (BM CFU assay)
BM CFU Assay
Ifnar1 het
Fancd2-WT(CFU)	Fancd2-KO(CFU count)
88	87
90	81
105	76
Supplementary Figure-1B
	Peripheral blood chimerism
1st_9w Total CD45		1st_9w_Myeloid		1st_9w_Lymphoid
WT	Fancd2 KO	WT	Fancd2 KO	WT	Fancd2 KO
88.6	23.4	14.1	1.02	84	98.5
84.3	4.27	14.7	0.36	83.8	98.2
90.5	17.7	12	16.6	86.5	82.142
85.8	3.6	8.19	5.15	89	93.3
90.2	69.5	11.5	10.2	84.9	81.8
25.9	3	2.34	12	95.4	83.4
87.1		7.84		87.8
84.2		22.9		71.3
88		24.9		65.2
87.2		18.1		71.9
Transplantation using 5x105 E12.5 FL Fancd2+/+ (n=10) and Fancd2-/- (n=6).
Chimerism 9 weeks after secondary transplantation from Fancd2+/+ (n=6 mice) or Fancd2-/- (n=6 mice) donors
Chimerism of total CD45 (left panel), -myeloid Mac1++Gr1+ (mid panel),
and -lymphoid CD220+CD3 (right panel)
2nd 9wTotal CD45		2nd 9w_Myeloid		2nd_9w_Lymphoid
WT	Fancd2 KO	WT	Fancd2 KO	WT	Fancd2 KO
9.71	0.14	5.25	19.4	91.35	76.4
72.2	0.043	7.31	57.1	83.86	38.1
82.7	0.056	10.9	17.9	80.7	71.4
0.14	0.24	8.22	20.3	90.4	55.13
62.8	9.27	5.89	9.88	86.69	77.2
75.3	0.04	10.3	35	85.7	55
Supplementary Figure-2A-F
Single-cell RNA seq data
have been deposited in Gene Expression Omnibus (GEO) with accession number: GSE173908.
Supplementary Figure-3B
	Total fetal liver cell number in Ifnar1 and Fancd2 genetic combinations
Ifnar 1 WT		Ifnar het		Ifnar KO
Fancd2-WT	Fancd2-KO	Fancd2-WT	Fancd2-KO	Fancd2-WT	Fancd2-KO
(n=36)	(n=17)	(n=33)	(n=15)	(n=10)	(n=6)
6263000	3170000	6265000	4520000	4450000	680500
6747000	4180000	7270000	4555000	3518000	1100000
5521000	4650000	9090000	4910000	5400000	950000
7275000	4860000	7517000	4286000	3750000	1200000
7358000	3860000	6765000	3800000	5710000	1000000
6221000	2913000	4300000	5330000	6640000	950000
7530000	5580000	5145000	5600000	5322000
6765000	5580000	4840000	3082500	4545000
4300000	4910000	4520000	5710000	4810000
5145000	2475000	4555000	6640000	3286000
4840000	1342500	4910000	5400000
4520000	3052500	4286000	8265000
4555000	5180000	3800000	6270000
4910000	1926666	5330000	7090000
4286000	2830000	5600000
3800000	2512000	3082500
5330000	3116000	5710000
5600000		6640000
2210000		5400000
1380000		8265000
2887500		6270000
3000000		7090000
3082500		6800000
5710000		3082500
6640000		5710000
5400000		6640000
8265000		5400000
8270000		8265000
8090000		8271000
8811000		8090000
4995000		8810000
5880000		1280000
2480000		2440000
3213333
3111000
2740000
Supplementary Figure-3F
Endogenous C MYC analysis by flow cytometry
Ifnar Het Fancd2WT/Het vs Ifnar het Fancd2-KO fetal liver ST HSCs.
c-MYC analysis by flowcytometry:normalised MFI(Median flourescent intensity) values.
	C MYC analysis in ST- HSCs
WT/Het (n= 5fetal livers)	KO(n=5 fetal liver)	BM(n=3 mice)
6.7	6.5	1
5.2	5.3	1
6.5	6.5	1
5.87	5.76
7.1	5.5
	OPP assay
Rate of protein synthesis in ST HSCs.
WT/Het(n=17 Fetal livers)	KO(n=7 fetal livers)	BM( n=5 mice)
2.13312	2.1208	1
2.05159	0.753825	1
2.02808	1.31857	1
1.98681	2.37543	1
2.20788	2.66934	1
2.1776	2.4234
2.22835	2.019
2.00937
2.0241
2.12584
1.70587
1.36858
2.71569
2.14228
2.26799
2.75956
2.56138
Supplementary Figure-3F
		ST-HSCs
	TPE-MI assay for unfolded proteins analysis.
Fetal liver normalized TPE-MI median flourescent intensity values with respective adult BM ST HSCs.
	Fancd2-WT/HET	Fancd2- KO
	Ifnar1 Het	Ifnar1 Het fetal livers)	Dam (n=3 mice)
	n=17 fetal Liver	n=8fetal Liver	BM
	1.25377	1.30402	1
	1.39447	1.62312	1
	0.579146	0.752513	1
	0.819095	0.723702
	0.795226	1.3084
	0.738693	1.0403
	0.724874	1.70603
	1.57582	2.96357
	1.44399
	1.5888
	0.754781
	1.44399
	0.903005
	1.76913
	0.747609
	1.79899
	1.32172
Supplementary Figure-3G
		ST-HSC
	TUDCA receiveed fetal liver ST HSCs Unfolded proteins
	WT/Het(n=19 fetal livers)	KO(n=6 fetal livers)	BM(n=4 mice)
	1.29257	1.79721	1
	1.58204	1.60991	1
	1.10217	2.46644	1
	1.93344	1.3579	1
	1.18266	1.27836
	1.40248	1.33016
	1.62571
	1.28555
	1.71672
	1.60068
	1.60978
	2.0182
	0.984795
	1.24094
	0.833918
	1.36608
	0.865497
	1.63258
	1.62998
Supplementary Figure-3H
TUDCA received Fancd2 cells cultured for 18 hours in the absence of TUDCA
TPE-MI assay were performed for Unfolded proteins analysis.
	ST-HSC
WT/Het(n=8 fetal livers)	KO(n=4 fetal livers)	BM(n=3 mice)
1.87771	3.89938	1
2.52322	5.01548	1
3.73684	13.0195	1
1.84211	14.8638
7.93713
5.54042
6.48802
7.54341
Supplementary Figure 4A
Cell proliferation kinetics
comparing WT (Fancd2+/+) and KO (Fancd2-/-) BM LT-HSCs during ex vivo expansion
Days	WT(n=3)			KO(n=3)
0	400	400	400	400	400	400
7	37500	25000	34500	15000	16000	13000
10	400000	270000	315000	100000	90000	87000
14	900000	1000500	1010000	450000	510000	540000
Supplementary Figure 4B
Unfolded protein analysis in exvivo expanded adult BM HSPCs(8 week old) by TPE-MI assay.
LT-HSC			ST-HSC
Fancd2-WT	Fancd2-KO		Fancd2-WT	Fancd2-KO
1	1.90081		1	2.42009
1	1.78452		1	1.87936
1	2.00163		1	1.53897
1	2.4		1	2.00027
MPP2			MPP3+MPP4
Fancd2-WT	Fancd2-KO		Fancd2-WT	Fancd2-KO
1	2.55849		1	2.486
1	1.78004		1	2.26403
1	1.8678		1	2.07146
1	1.99642		1	2.06217
Supplementary Figure 4C
Peripheral blood chimerism
KO (Fancd2-/-) cells in recipient mice after competitive transplantation
of whole bone marrow Fancd2+/+, Fancd2-/- cells followed by injection of PBS (n=6 mice)
or TUDCA (n=6 mice
Week	Fancd2-KO+PBS(n=6 mice)
2nd	22.7	22.4	26.5	24.6	23.8	24.5
4th	13.7	13.5	11	13.4	12.2	15
6th	8.15	10.5	9.06	11.3	10	10.7
8th	7.02	11.8	8.41	7.26	8.54	9.16
10th	6.13	7.51	8.18	8.21	6.69	6.23
Week	KO+TUDCA(n=6)
2nd	26.2	24.7	27.4	26.9	28.9	27
4th	15.1	16.2	16.1	17.1	14	15
6th	12.9	11	15.3	14	12.5	14.3
8th	10.7	14.7	8.72	9.93	10	12.3
10th	11.1	7.73	7.29	7.96	8.22	10.6
Supplementary Figure 4D
Endoplasmic reticulum associated degration (ERAD) pathway related genes expression.
Normalized gene expression numbers and P values
obtained from re-analysis of published data set GSE157591
Genes	Healthy	Patients	P value
DERL3	369.002	2418.3	5.2e-08
HSPA6	4.972	34.1412	2.7e-07
HSPA5	3748	6431.5	0.033
HERPUD1	844.808	4329.97	3.9e-10
EDEM3	111.612	202.723	0.0026
SEL1L	147.525	359.923	0.00017
XBP1	1943.84	6351.78	1.3e-05
Supplementary Figure 4E
Normalised gene expression numbers obtained from re-analysis of GSE157591
IFNAR1			IFNAR2
WT(n=5)	KO(n=5)		WT(n=5)	KO(n=6)
231.794	407.075		254.267	384.302
211.771	598.841		356.541	705.641
333.654	543.195		415.583	811.923
273.111	728.3		332.95	997.682
116.334	539.174		264.275	571.762
	354.729			277.248
IFNGR2
WT(n=5)	KO(n=6)
378.19	469.702
269.2	509.841
438.144	514.505
426.544	612.966
268.518	485.849
	473.283
Supplementary Figure 5B
MYC target genes profiling in Fancd2-/- fetal liver LSK cells (n=11 fetal livers)
KO cells expression values were normalized with the corresponding .
Fancd2-WT fetal liver(n=12) LSK cells
	Fetal liver
Target Genes	WT/Het(n=12 Embryos)	KO(n=11Embryos)
RPL5	1	30
RPL23	1	25
ATF4	1	23
RPL13	1	22
EIF4A1	1	22
RPL19	1	21
SNRNPB	1	20
MAX	1	19
CCNB1	1	19
CDKN1B	1	18.5
MAZ	1	17
PTEN	1	17
NOLC1	1	17
BAX	1	17
CDK4	1	16
MYCN	1	16
FASN	1	16
PCNA	1	15
MGST1	1	15
CDKN2B	1	15.7
PDK1	1	14
CCL5	1	14
CDC25A	1	13
CHK1	1	13
EIF4E	1	13
ENO1	1	11
SRSF1	1	10
MYCL	1	10
RPS5	1	9
NCL	1	7
TRP53	1	4
DDX10	1	2
TPI1	1	-5
ILK1	1	-7
UBE2C	1	-4
TOP1	1	-8
Supplementary Figure 5C
MYC analysis by flowcytometry in 8 week old adult freshly flushed BM HSPCs.
Normalized Median flourescent intensity (MFI) values.
LT-HSC
WT(n=3 mice)	KO(n=3 mice)
1	0.8
1	1.1
1	1.38
MPP2
WT(n=3 mice)	KO(n=3 mice)
1	0.81
1	0.826
1	0.801
	MPP4
WT(n=3 mice)	KO(n=3 mice)
1	1.03
1	0.86
1	0.885
ST-HSC
WT(n=3 mice)	KO(n=3 mice)
1	0.996
1	1.31
1	0.78
MPP3
WT(n=3 mice)	KO(n=3 mice)
1	0.917
1	0.798
1	0.863
Supplementary Figure 5D
Rate of protein synthesis analyssis in 8 week old adult agematched BM by in vivo OPP assay
Normalised median flourescent intensity (MFI).
	Relative OPP incorporation
	LT-HSCs
WT(n=3 mice)	KO(n=3 mice)
1	1.3
1	1.1
1	0.84
	ST HSCs
WT(n=3 mice)	KO(n=3 mice)
1	1.8
1	1.3
1	0.9
	MPP3
WT(n=3mice)	KO(n=3 mice)
1	2
1	1.5
1	1.2
	MPP2
WT(n=3 mice)	KO(n=3mice)
1	1.5
1	1.38
1	1.1
	MPP4
WT(n=3 mice)	KO(n=3 mice)
1	2.1
1	1.4
1	1.2
Supplementary Figure 5E
	Cell number analysis
WT (n=3 independent experiments	KO(n=3 independent experiments)	WT+JQ1(n=3 indipendent experiments)	KO+JQ1(n= 3 independent exeperiments)
223000	96000	150000	13000
160000	13000	100000	33000
191500	90000	120000	23000
Supplementary Figure 5F
MFI of Phosphorylated c mYC analysis by flowcytometry in Ex vivo exapnded adult BM HSPCs
WT(n=3mice)	KO(n=3 mice)
1	2.1
1	2.8
1	1.4
